# Supplementary material for: The Bacteriomes of Ileal Mucosa and Cecal Content of Broiler Chickens and Turkeys as Revealed by Metagenomic Analysis
Source: Hindawi journal article supplement (doi:10.1155/2016/4320412), 2016-01-01
Supplement: f1 [file 4320412.f1.pdf]

Suppl. Table 1. Bacterial genera that were represented both in the global diversity database of chicken cecal bacteria and in this study

| Lineage                                                                                                       | Genus                                                | # of Seqs in global database | # of Seqs in this study |
|---------------------------------------------------------------------------------------------------------------|------------------------------------------------------|------------------------------|-------------------------|
| <i>Firmicutes; Clostridia; Clostridiales; Clostridiaceae 1</i>                                                | <i>Clostridium sensu stricto</i>                     | 1                            | 1                       |
| <i>Actinobacteria; Actinobacteria; Coriobacteridae; Coriobacteriales; Coriobacterineae; Coriobacteriaceae</i> | <i>Enterorhabdus</i>                                 | 1                            | 1                       |
| <i>Tenericutes; Mollicutes; Anaeroplasmatales; Anaeroplasmataceae</i>                                         | <i>Anaeroplasma</i>                                  | 1                            | 2                       |
| <i>Proteobacteria; Gammaproteobacteria; Enterobacteriales; Enterobacteriaceae</i>                             | <i>Proteus</i>                                       | 1                            | 2                       |
| <i>Firmicutes; Clostridia; Clostridiales; Eubacteriaceae</i>                                                  | <i>Eubacterium</i>                                   | 1                            | 10                      |
| <i>Firmicutes; Clostridia; Clostridiales; Ruminococcaceae</i>                                                 | <i>Acetanaerobacterium</i>                           | 1                            | 12                      |
| <i>Deferribacteres; Deferribacteres; Deferribacterales; Deferribacteraceae</i>                                | <i>Mucispirillum</i>                                 | 1                            | 46                      |
| <i>Proteobacteria; Betaproteobacteria; Burkholderiales; Sutterellaceae</i>                                    | <i>Parasutterella</i>                                | 2                            | 2                       |
| <i>Firmicutes; Clostridia; Clostridiales; Ruminococcaceae</i>                                                 | <i>Sporobacter</i>                                   | 2                            | 2                       |
| <i>Proteobacteria; Epsilonproteobacteria; Campylobacterales; Helicobacteraceae</i>                            | <i>Helicobacter</i>                                  | 2                            | 5                       |
| <i>Firmicutes; Clostridia; Clostridiales; Ruminococcaceae</i>                                                 | <i>Anaerofilum</i>                                   | 2                            | 12                      |
| <i>Firmicutes; Clostridia; Clostridiales; Peptostreptococcaceae</i>                                           | <i>Clostridium XI</i>                                | 3                            | 1                       |
| <i>Actinobacteria; Actinobacteria; Actinobacteridae; Bifidobacteriales; Bifidobacteriaceae</i>                | <i>Bifidobacterium</i>                               | 3                            | 2                       |
| <i>Proteobacteria; Deltaproteobacteria; Desulfovibrionales; Desulfovibrionaceae</i>                           | <i>Desulfovibrio</i>                                 | 3                            | 2                       |
| <i>Proteobacteria; Deltaproteobacteria; Desulfovibrionales; Desulfovibrionaceae</i>                           | <i>Bilophila</i>                                     | 3                            | 5                       |
| <i>Bacteroidetes; Bacteroidia; Bacteroidales; Porphyromonadaceae</i>                                          | <i>Parabacteroides</i>                               | 3                            | 17                      |
| <i>Firmicutes; Clostridia; Clostridiales; Lachnospiraceae</i>                                                 | <i>Roseburia</i>                                     | 3                            | 23                      |
| <i>Firmicutes; Erysipelotrichia; Erysipelotrichales; Erysipelotrichaceae</i>                                  | <i>Coprobacillus</i>                                 | 4                            | 2                       |
| <i>Firmicutes; Erysipelotrichia; Erysipelotrichales; Erysipelotrichaceae</i>                                  | <i>Clostridium XVIII</i>                             | 4                            | 34                      |
| <i>Firmicutes; Bacilli; Lactobacillales; Enterococcaceae</i>                                                  | <i>Enterococcus</i>                                  | 5                            | 6                       |
| <i>Bacteroidetes; Bacteroidia; Bacteroidales; Porphyromonadaceae</i>                                          | <i>Barnesiella</i>                                   | 5                            | 62                      |
| <i>Firmicutes; Clostridia; Clostridiales; Lachnospiraceae</i>                                                 | <i>Coprococcus</i>                                   | 6                            | 6                       |
| <i>Firmicutes; Clostridia; Clostridiales; Lachnospiraceae</i>                                                 | <i>Dorea</i>                                         | 8                            | 1                       |
| <i>Firmicutes; Clostridia; Clostridiales; Ruminococcaceae</i>                                                 | <i>Flavonifractor</i>                                | 8                            | 110                     |
| <i>Bacteroidetes; Bacteroidia; Bacteroidales; Rikenellaceae</i>                                               | <i>Rikenella</i>                                     | 9                            | 1                       |
| <i>Firmicutes; Erysipelotrichia; Erysipelotrichales; Erysipelotrichaceae</i>                                  | <i>Erysipelotrichaceae</i><br><i>_incertae_sedis</i> | 9                            | 24                      |
| <i>Actinobacteria; Actinobacteria; Coriobacteridae; Coriobacteriales; Coriobacterineae; Coriobacteriaceae</i> | <i>Collinsella</i>                                   | 10                           | 5                       |
| <i>Firmicutes; Clostridia; Clostridiales; Ruminococcaceae</i>                                                 | <i>Anaerotruncus</i>                                 | 10                           | 13                      |
| <i>Firmicutes; Clostridia; Clostridiales; Lachnospiraceae</i>                                                 | <i>Clostridium XIVb</i>                              | 10                           | 38                      |

|                                                                                   |                                                  |    |     |
|-----------------------------------------------------------------------------------|--------------------------------------------------|----|-----|
| <i>Firmicutes; Clostridia; Clostridiales; Ruminococcaceae</i>                     | <i>Pseudoflavonifractor</i>                      | 10 | 68  |
| <i>Firmicutes; Clostridia; Clostridiales; Ruminococcaceae</i>                     | <i>Acetivibrio</i>                               | 12 | 4   |
| <i>Firmicutes; Negativicutes; Selenomonadales; Acidaminococcaceae</i>             | <i>Phascolarctobacterium</i>                     | 15 | 7   |
| <i>Proteobacteria; Alphaproteobacteria; Rhizobiales; Hyphomicrobiaceae</i>        | <i>Gemmiger</i>                                  | 15 | 37  |
| <i>Firmicutes; Clostridia; Clostridiales; Ruminococcaceae</i>                     | <i>Butyricoccus</i>                              | 15 | 68  |
| <i>Firmicutes; Clostridia; Clostridiales; Ruminococcaceae</i>                     | <i>Oscillibacter</i>                             | 16 | 69  |
| <i>Bacteroidetes; Bacteroidia; Bacteroidales; Rikenellaceae</i>                   | <i>Alistipes</i>                                 | 18 | 37  |
| <i>Firmicutes; Clostridia; Clostridiales; Ruminococcaceae</i>                     | <i>Subdoligranulum</i>                           | 19 | 6   |
| <i>Firmicutes; Clostridia; Clostridiales; Lachnospiraceae</i>                     | <i>Blautia</i>                                   | 28 | 10  |
| <i>Firmicutes; Bacilli; Lactobacillales; Lactobacillaceae</i>                     | <i>Lactobacillus</i>                             | 32 | 21  |
| <i>Proteobacteria; Gammaproteobacteria; Enterobacteriales; Enterobacteriaceae</i> | <i>Escherichia/Shigella</i>                      | 33 | 4   |
| <i>Firmicutes; Clostridia; Clostridiales; Lachnospiraceae</i>                     | <i>Clostridium XIVa</i>                          | 39 | 3   |
| <i>Bacteroidetes; Bacteroidia; Bacteroidales; Bacteroidaceae</i>                  | <i>Bacteroides</i>                               | 45 | 41  |
| <i>Firmicutes; Clostridia; Clostridiales; Ruminococcaceae</i>                     | <i>Clostridium IV</i>                            | 49 | 28  |
| <i>Firmicutes; Clostridia; Clostridiales; Ruminococcaceae</i>                     | <i>Faecalibacterium</i>                          | 54 | 114 |
| <i>Firmicutes; Clostridia; Clostridiales; Lachnospiraceae</i>                     | <i>Lachnospiraceae</i><br><i>_incertae_sedis</i> | 84 | 9   |

Suppl. Table 2. Bacterial genera not detected in this study but represented in the global diversity database of chicken cecal bacteria

| Lineage                                                                                                       | Genus                   | # of Sequences |
|---------------------------------------------------------------------------------------------------------------|-------------------------|----------------|
| <i>Proteobacteria; Gammaproteobacteria; Enterobacteriales; Enterobacteriaceae</i>                             | <i>Salmonella</i>       | 41             |
| <i>Firmicutes; Negativicutes; Selenomonadales; Veillonellaceae</i>                                            | <i>Megamonas</i>        | 22             |
| <i>Bacteroidetes; Bacteroidia; Bacteroidales; Prevotellaceae;</i>                                             | <i>Paraprevotella</i>   | 16             |
| <i>Actinobacteria; Actinobacteria; Coriobacteridae; Coriobacteriales; Coriobacterineae; Coriobacteriaceae</i> | <i>Olsenella</i>        | 8              |
| <i>Proteobacteria; Gammaproteobacteria; Enterobacteriales; Enterobacteriaceae</i>                             | <i>Klebsiella</i>       | 6              |
| <i>Firmicutes; Clostridia; Clostridiales; Lachnospiraceae</i>                                                 | <i>Lactonifactor</i>    | 6              |
| <i>Firmicutes; Negativicutes; Selenomonadales; Veillonellaceae</i>                                            | <i>Megasphaera</i>      | 5              |
| <i>Proteobacteria; Gammaproteobacteria; Pseudomonadales; Pseudomonadaceae</i>                                 | <i>Pseudomonas</i>      | 5              |
| <i>Firmicutes; Clostridia; Clostridiales; Lachnospiraceae</i>                                                 | <i>Robinsoniella</i>    | 5              |
| <i>Firmicutes; Clostridia; Clostridiales; Lachnospiraceae</i>                                                 | <i>Anaerostipes</i>     | 4              |
| <i>Verrucomicrobia; Verrucomicrobiae; Verrucomicrobiales; Verrucomicrobiaceae</i>                             | <i>Akkermansia</i>      | 3              |
| <i>Proteobacteria; Gammaproteobacteria; Enterobacteriales; Enterobacteriaceae</i>                             | <i>Enterobacter</i>     | 3              |
| <i>Proteobacteria; Gammaproteobacteria; Aeromonadales; Succinivibrionaceae</i>                                | <i>Succinatimonas</i>   | 3              |
| <i>Firmicutes; Clostridia; Clostridiales; Clostridiales_Incertae_Sedis_XIII</i>                               | <i>Anaerovorax</i>      | 2              |
| <i>Actinobacteria; Actinobacteria; Coriobacteridae; Coriobacteriales; Coriobacterineae; Coriobacteriaceae</i> | <i>Coriobacterium</i>   | 2              |
| <i>Bacteroidetes; Bacteroidia; Bacteroidales; Prevotellaceae</i>                                              | <i>Hallella</i>         | 2              |
| <i>Firmicutes; Clostridia; Clostridiales; Lachnospiraceae</i>                                                 | <i>Hespellia</i>        | 2              |
| <i>Proteobacteria; Betaproteobacteria; Burkholderiales; Oxalobacteraceae</i>                                  | <i>Massilia</i>         | 2              |
| <i>Proteobacteria; Gammaproteobacteria; Xanthomonadales; Xanthomonadaceae</i>                                 | <i>Stenotrophomonas</i> | 2              |
| <i>Proteobacteria; Betaproteobacteria; Burkholderiales; Sutterellaceae</i>                                    | <i>Sutterella</i>       | 2              |
| <i>Proteobacteria; Deltaproteobacteria; Bdellovibrionales; Bdellovibrionaceae</i>                             | <i>Vampirovibrio</i>    | 2              |
| <i>Firmicutes; Negativicutes; Selenomonadales; Acidaminococcaceae</i>                                         | <i>Acidaminococcus</i>  | 1              |
| <i>Proteobacteria; Gammaproteobacteria; Aeromonadales; Aeromonadaceae</i>                                     | <i>Aeromonas</i>        | 1              |
| <i>Fusobacteria; Fusobacteria; Fusobacteriales; Fusobacteriaceae</i>                                          | <i>Clostridium XIX</i>  | 1              |
| <i>Proteobacteria; Gammaproteobacteria; Pasteurellales; Pasteurellaceae</i>                                   | <i>Gallibacterium</i>   | 1              |
| <i>Firmicutes; Clostridia; Clostridiales; Peptococcaceae 1</i>                                                | <i>Peptococcus</i>      | 1              |
| <i>Spirochaetes; Spirochaetes; Spirochaetales; Spirochaetaceae</i>                                            | <i>Spirochaeta</i>      | 1              |
| <i>Firmicutes; Clostridia; Clostridiales; Lachnospiraceae</i>                                                 | <i>Syntrophococcus</i>  | 1              |
| <i>Proteobacteria; Gammaproteobacteria; Enterobacteriales; Enterobacteriaceae</i>                             | <i>Trabulsiella</i>     | 1              |

Suppl. Table 3. Bacterial genera detected in this study but not represented in the global diversity database of chicken cecal bacteria

| <b>Lineage</b>                                                                                           | <b>Genus</b>                    | <b># of Sequence</b> |
|----------------------------------------------------------------------------------------------------------|---------------------------------|----------------------|
| <i>Bacteroidetes;Bacteroidia;Bacteroidales;Porphyromonadaceae</i>                                        | <i>Butyricimonas</i>            | 38                   |
| <i>Bacteroidetes;Bacteroidia;Bacteroidales;Porphyromonadaceae</i>                                        | <i>Odoribacter</i>              | 26                   |
| <i>Firmicutes;Clostridia;Clostridiales;Ruminococcaceae</i>                                               | <i>Hydrogenoanaerobacterium</i> | 10                   |
| <i>Firmicutes;Clostridia;Clostridiales;Lachnospiraceae</i>                                               | <i>Moryella</i>                 | 7                    |
| <i>Firmicutes;Clostridia;Clostridiales;Lachnospiraceae</i>                                               | <i>Parasporobacterium</i>       | 6                    |
| <i>Firmicutes;Clostridia;Clostridiales;Ruminococcaceae</i>                                               | <i>Ruminococcus</i>             | 5                    |
| <i>Firmicutes;Clostridia;Clostridiales;Ruminococcaceae</i>                                               | <i>Saccharofermentans</i>       | 5                    |
| <i>Actinobacteria;Actinobacteria;Actinobacteridae;Bifidobacteriales;Bifidobacteriaceae</i>               | <i>Aeriscardovia</i>            | 4                    |
| <i>Firmicutes;Clostridia;Clostridiales;Ruminococcaceae</i>                                               | <i>Clostridium III</i>          | 4                    |
| <i>Firmicutes;Clostridia;Clostridiales;Ruminococcaceae</i>                                               | <i>Ethanoligenens</i>           | 4                    |
| <i>Firmicutes;Clostridia;Clostridiales;Lachnospiraceae</i>                                               | <i>Marvinbryantia</i>           | 3                    |
| <i>Firmicutes;Bacilli;Bacillales;Staphylococcaceae</i>                                                   | <i>Salinicoccus</i>             | 3                    |
| <i>Firmicutes;Bacilli;Lactobacillales;Streptococcaceae</i>                                               | <i>Streptococcus</i>            | 3                    |
| <i>Firmicutes;Clostridia;Clostridiales;Incertae Sedis XI</i>                                             | <i>Anaerosphaera</i>            | 2                    |
| <i>Actinobacteria;Actinobacteria;Coriobacteridae;Coriobacteriales;Coriobacterineae;Coriobacteriaceae</i> | <i>Eggerthella</i>              | 2                    |
| <i>Fusobacteria;Fusobacteria;Fusobacteriales;Fusobacteriaceae</i>                                        | <i>Fusobacterium</i>            | 2                    |
| <i>Firmicutes;Clostridia;Clostridiales;Lachnospiraceae;</i>                                              | <i>Lachnospira</i>              | 2                    |
| <i>Actinobacteria;Actinobacteria;Coriobacteridae;Coriobacteriales;Coriobacterineae;Coriobacteriaceae</i> | <i>Slackia</i>                  | 2                    |
| <i>Firmicutes;Clostridia;Clostridiales;Lachnospiraceae</i>                                               | <i>Sporobacterium</i>           | 2                    |
| <i>Firmicutes;Bacilli;Bacillales;Staphylococcaceae</i>                                                   | <i>Staphylococcus</i>           | 2                    |
| <i>Lentisphaerae;Lentisphaeria;Victivallales;Victivallaceae</i>                                          | <i>Victivallis</i>              | 2                    |
| <i>Firmicutes;Erysipelotrichia;Erysipelotrichales;Erysipelotrichaceae</i>                                | <i>Allobaculum</i>              | 1                    |
| <i>Firmicutes;Bacilli;Lactobacillales;Carnobacteriaceae</i>                                              | <i>Atopostipes</i>              | 1                    |
| <i>Firmicutes;Clostridia;Clostridiales;Lachnospiraceae</i>                                               | <i>Butyrivibrio</i>             | 1                    |
| <i>Synergistetes;Synergistia;Synergistales;Synergistaceae</i>                                            | <i>Dethiosulfovibrio</i>        | 1                    |
| <i>Actinobacteria;Actinobacteria;Actinobacteridae;Actinomycetales;Corynebacterineae;Dietziaceae</i>      | <i>Dietzia</i>                  | 1                    |
| <i>Firmicutes;Bacilli;Lactobacillales;Carnobacteriaceae</i>                                              | <i>Dolosigranulum</i>           | 1                    |
| <i>Firmicutes;Clostridia;Clostridiales;Ruminococcaceae</i>                                               | <i>Fastidiosipila</i>           | 1                    |
| <i>Firmicutes;Bacilli;Bacillales;Paenibacillaceae 1</i>                                                  | <i>Fontibacillus</i>            | 1                    |
| <i>Actinobacteria;Actinobacteria;Coriobacteridae;Coriobacteriales;Coriobacterineae;Coriobacteriaceae</i> | <i>Gordonibacter</i>            | 1                    |
| <i>Firmicutes;Erysipelotrichia;Erysipelotrichales;Erysipelotrichaceae</i>                                | <i>Holdemania</i>               | 1                    |
| <i>Firmicutes;Clostridia;Clostridiales;Gracilibacteraceae</i>                                            | <i>Lutispora</i>                | 1                    |
| <i>Firmicutes;Bacilli;Bacillales;Staphylococcaceae</i>                                                   | <i>Nosocomiicoccus</i>          | 1                    |
| <i>Firmicutes;Clostridia;Clostridiales;Lachnospiraceae</i>                                               | <i>Oribacterium</i>             | 1                    |
| <i>Firmicutes;Clostridia;Clostridiales;Syntrophomonadaceae</i>                                           | <i>Pelospira</i>                | 1                    |
| <i>Firmicutes;Clostridia;Clostridiales;Eubacteriaceae</i>                                                | <i>Pseudoramibacter</i>         | 1                    |
| <i>Firmicutes;Clostridia;Clostridiales;Clostridiaceae 1</i>                                              | <i>Sarcina</i>                  | 1                    |
| <i>Bacteroidetes;Bacteroidia;Bacteroidales;Porphyromonadaceae</i>                                        | <i>Tannerella</i>               | 1                    |
| <i>Firmicutes;Clostridia;Clostridiales;Clostridiales_Incertae Sedis XI</i>                               | <i>Tepidimicrobium</i>          | 1                    |
